# Supplementary material for: Model Linking Plasma and Intracellular Tenofovir/Emtricitabine with Deoxynucleoside Triphosphates
Source: PubMed Central journal article supplement (PMC5104339; doi:10.1371/journal.pone.0165505), 2016-11-10
Supplement: pone.0165505.s001.pdf [file pone.0165505.s001.pdf]

## Supplements

Supplement equations:

gut: 
$$\frac{dA(1)}{dt} = -K_a \times A(1) \quad (A)$$

central: 
$$\frac{dA(2)}{dt} = K_a \times A(1) - \frac{CL}{V_c} \times A(2) - \frac{Q}{V_c} \times A(2) + \frac{Q}{V_p} \times A(3) \quad (B)$$

peripheral: 
$$\frac{dA(3)}{dt} = \frac{Q}{V_c} \times A(2) - \frac{Q}{V_p} \times A(3) \quad (C)$$

dGTP: 
$$\frac{dA(7)}{dt} = K_{in}^o \times \left( 1 - \frac{1}{1 + Time^\nu} \times \frac{A(4)}{A(4) + EC_{50}} \right) - A(7) \times K_{out} \quad (D)$$

|            | Model Output<br>Condition Number | Bootstrapping<br>Success Rate | VPC<br>Obs outside 90% CI |
|------------|----------------------------------|-------------------------------|---------------------------|
| TFV plasma | 25.3                             | 99.2%                         | 7.59%                     |
| FTC plasma | 79.6                             | 94.3%                         | 7.28%                     |
| TFV-DP IC  | 24.9                             | 99.3%                         | 1.81%                     |
| FTC-TP IC  | 27.8                             | 99.5%                         | 5.00%                     |
| dATP       | 6.0                              | 95.7%                         | 9.89%                     |
| dCTP       | 5.5                              | 99.7%                         | 10.4%                     |
| dGTP       | 4.4                              | 99.2%                         | 12.0%                     |
| TTP        | 7.5                              | 99.9%                         | 11.6%                     |

**Table A. Other model evaluation results.** Obs: observed values.

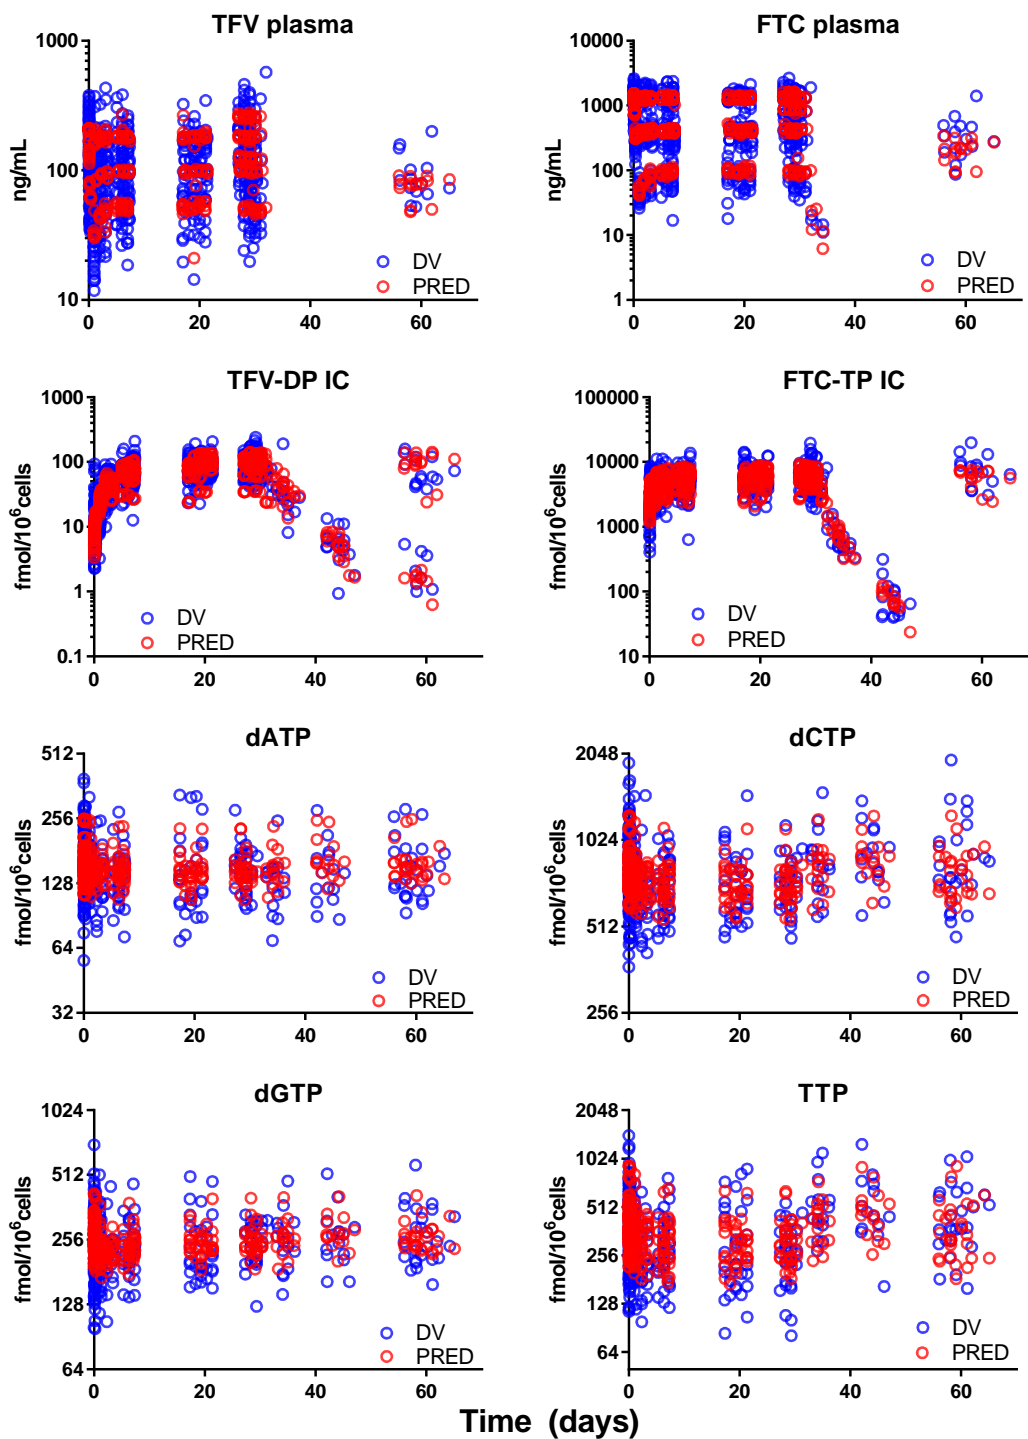

Figure A. Dependent variables (observed values) and predicted values vs time plots. IC: intracellular. PRED: predicted values. DV: dependent variables.

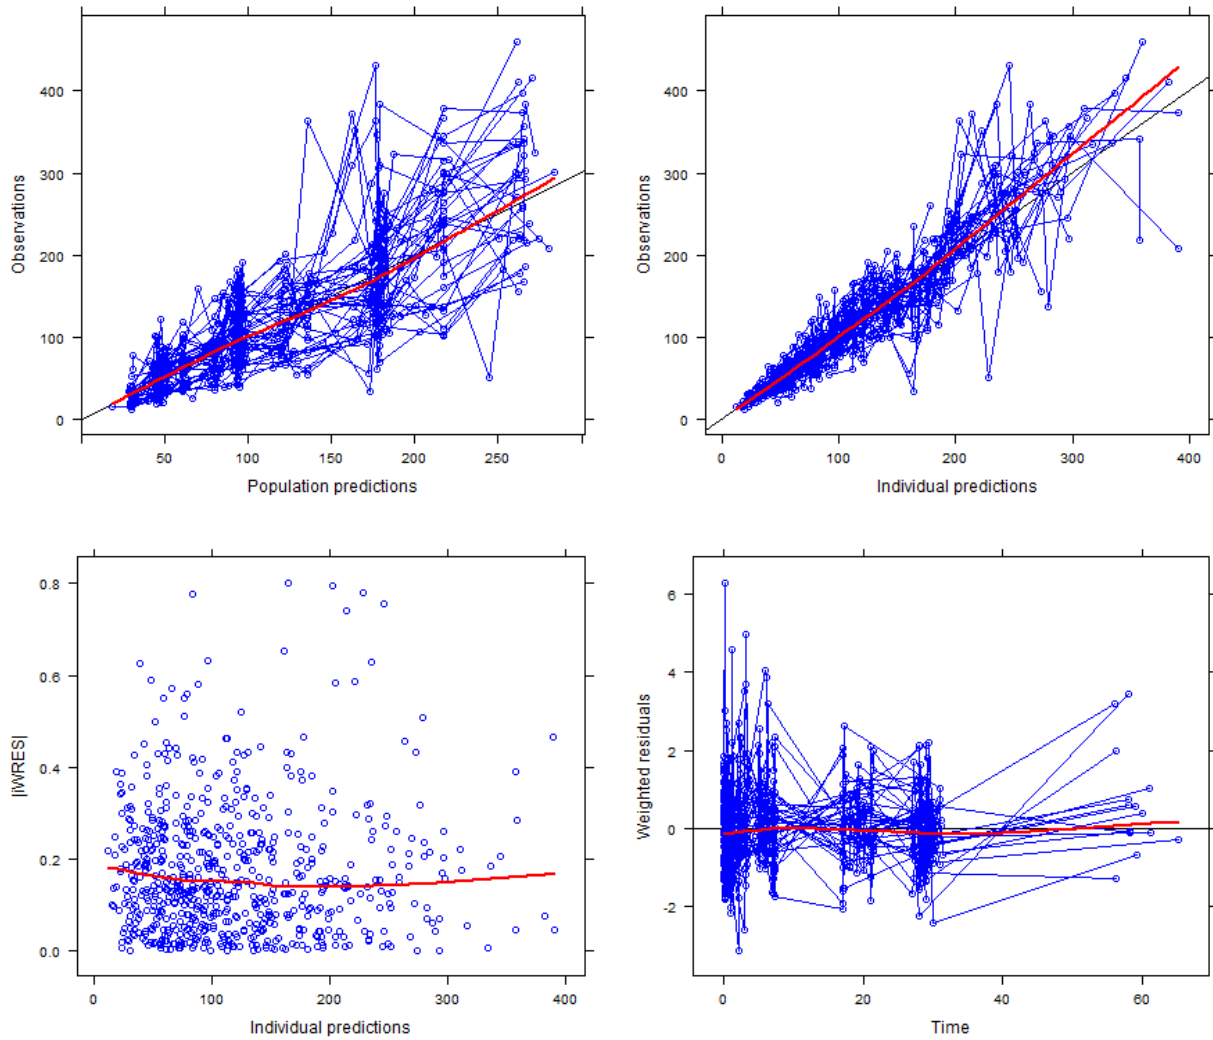

**Figure B. Basic goodness of fit plots of TFV plasma model.** Red line represents average values.

Black line represents theoretical values. Data from the same individual are showed in blue

circles and are connected by lines. |IWRES|: absolute values of individual weighted residuals.

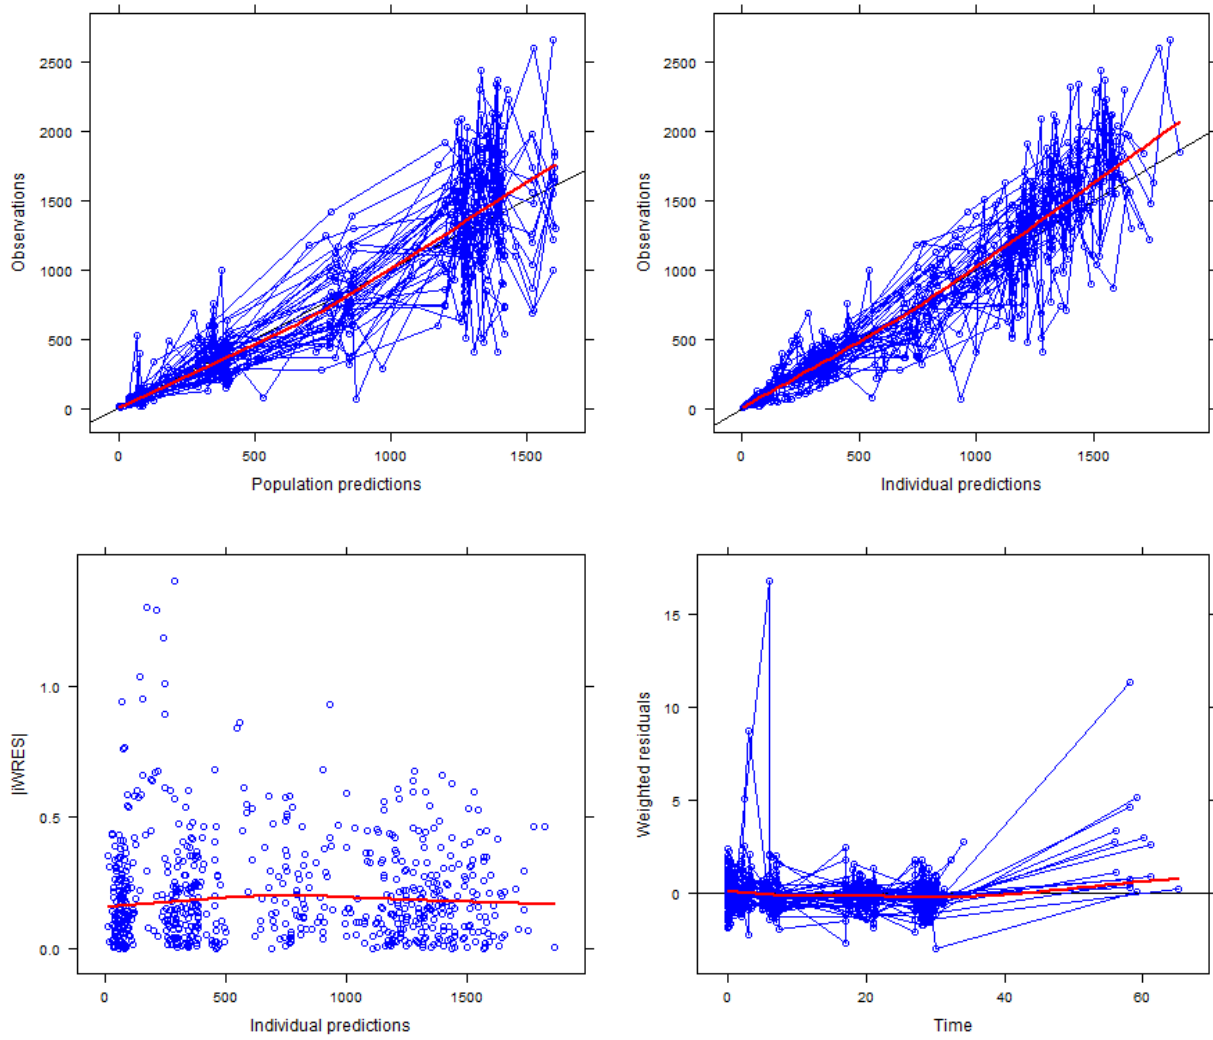

**Figure C. Basic goodness of fit plots of FTC plasma model.** Red line represents average values.

Black line represents theoretical values. Data from the same individual are showed in blue

circles and are connected by lines.  $|IWRES|$ : absolute values of individual weighted residuals.

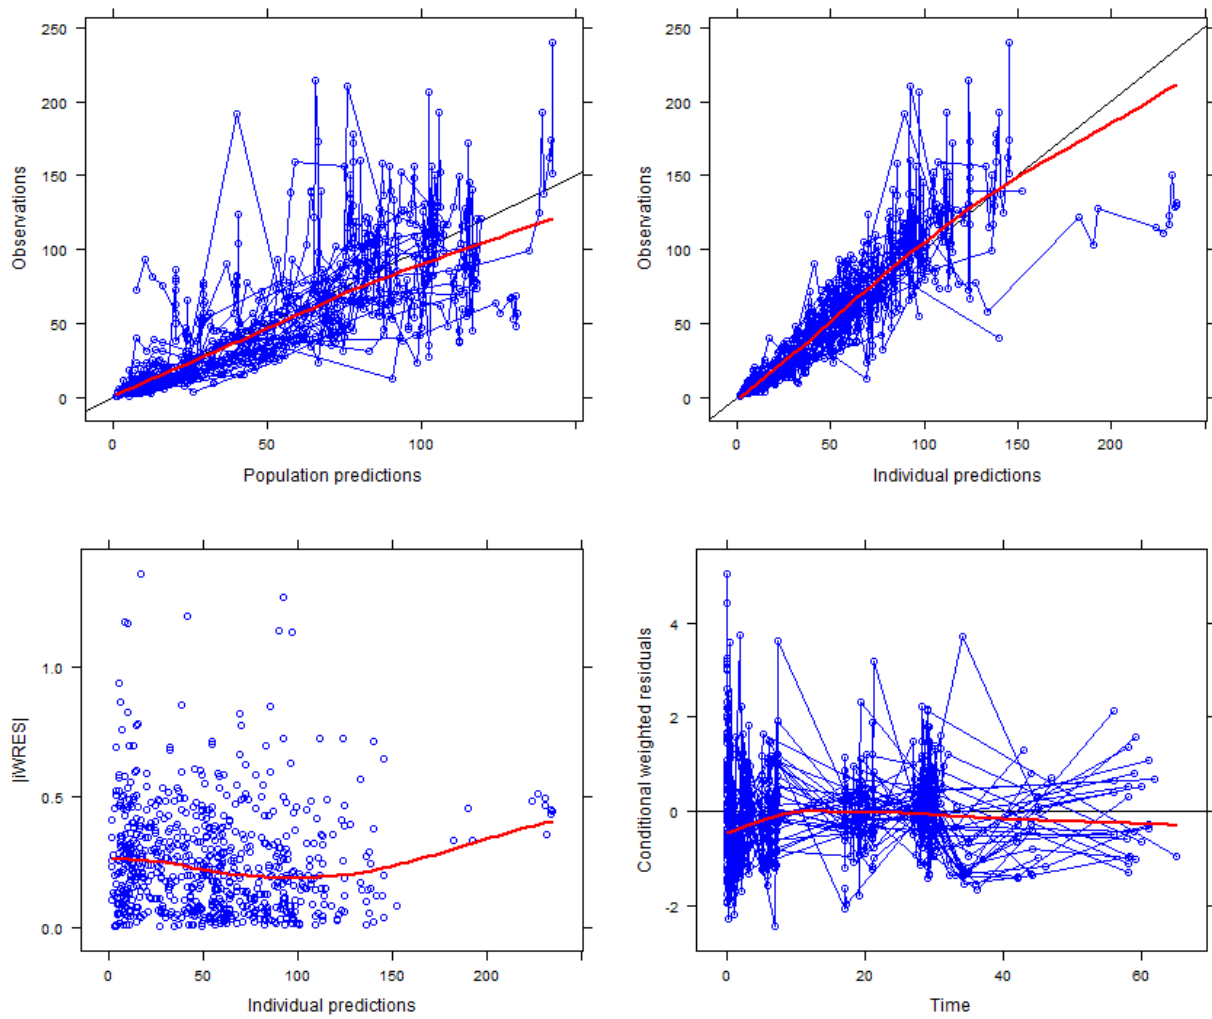

**Figure D. Basic goodness of fit plots of intracellular TFV-DP model.** Red line represents average values. Black line represents theoretical values. Data from the same individual are showed in blue circles and are connected by lines. |iWRES|: absolute values of individual weighted residuals.

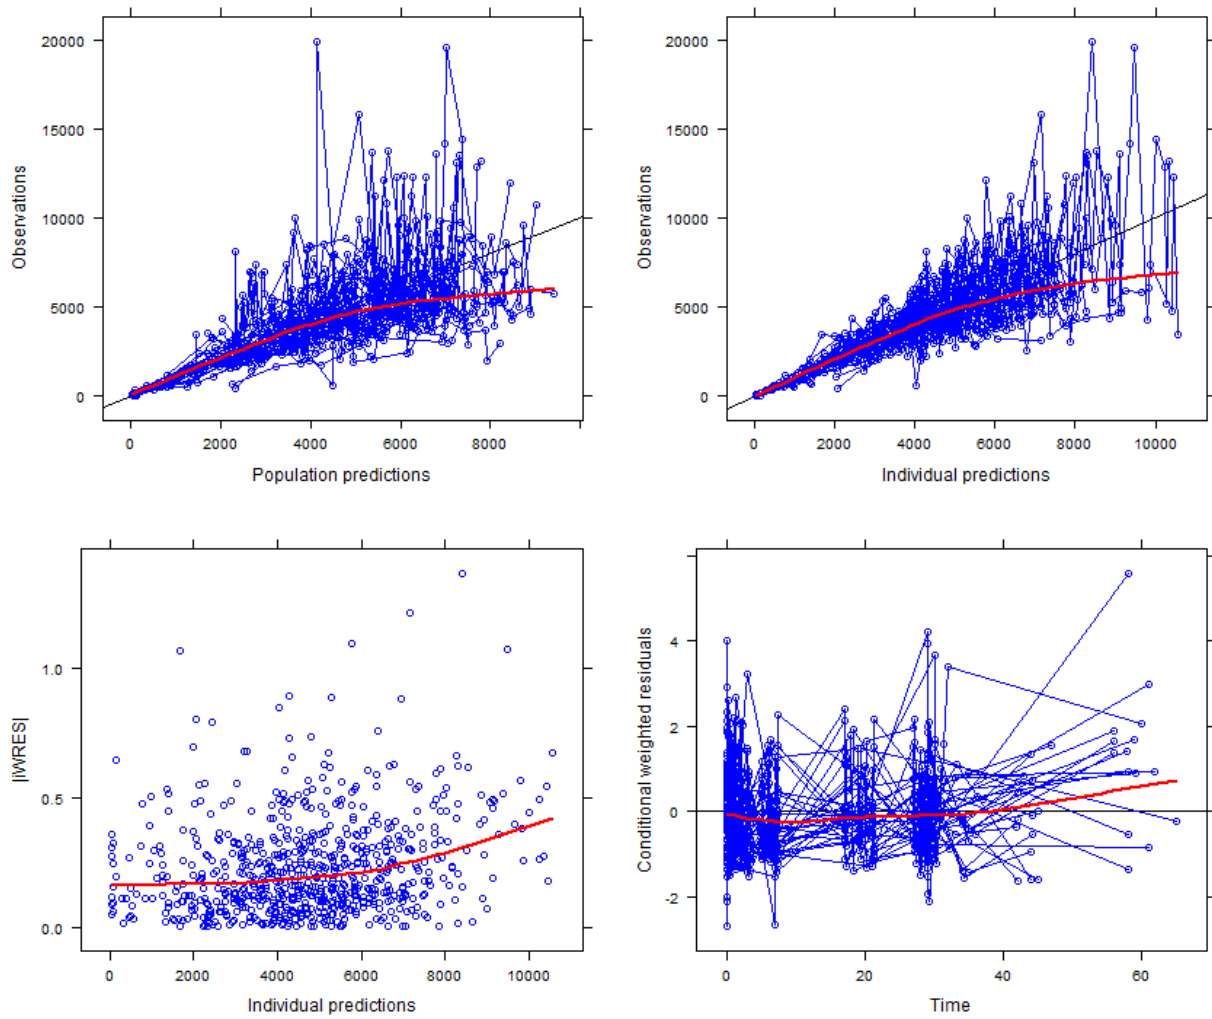

**Figure E. Basic goodness of fit plots of intracellular FTC-TP model.** Red line represents average values. Black line represents theoretical values. Data from the same individual are showed in blue circles and are connected by lines.  $|iWRES|$ : absolute values of individual weighted residuals.

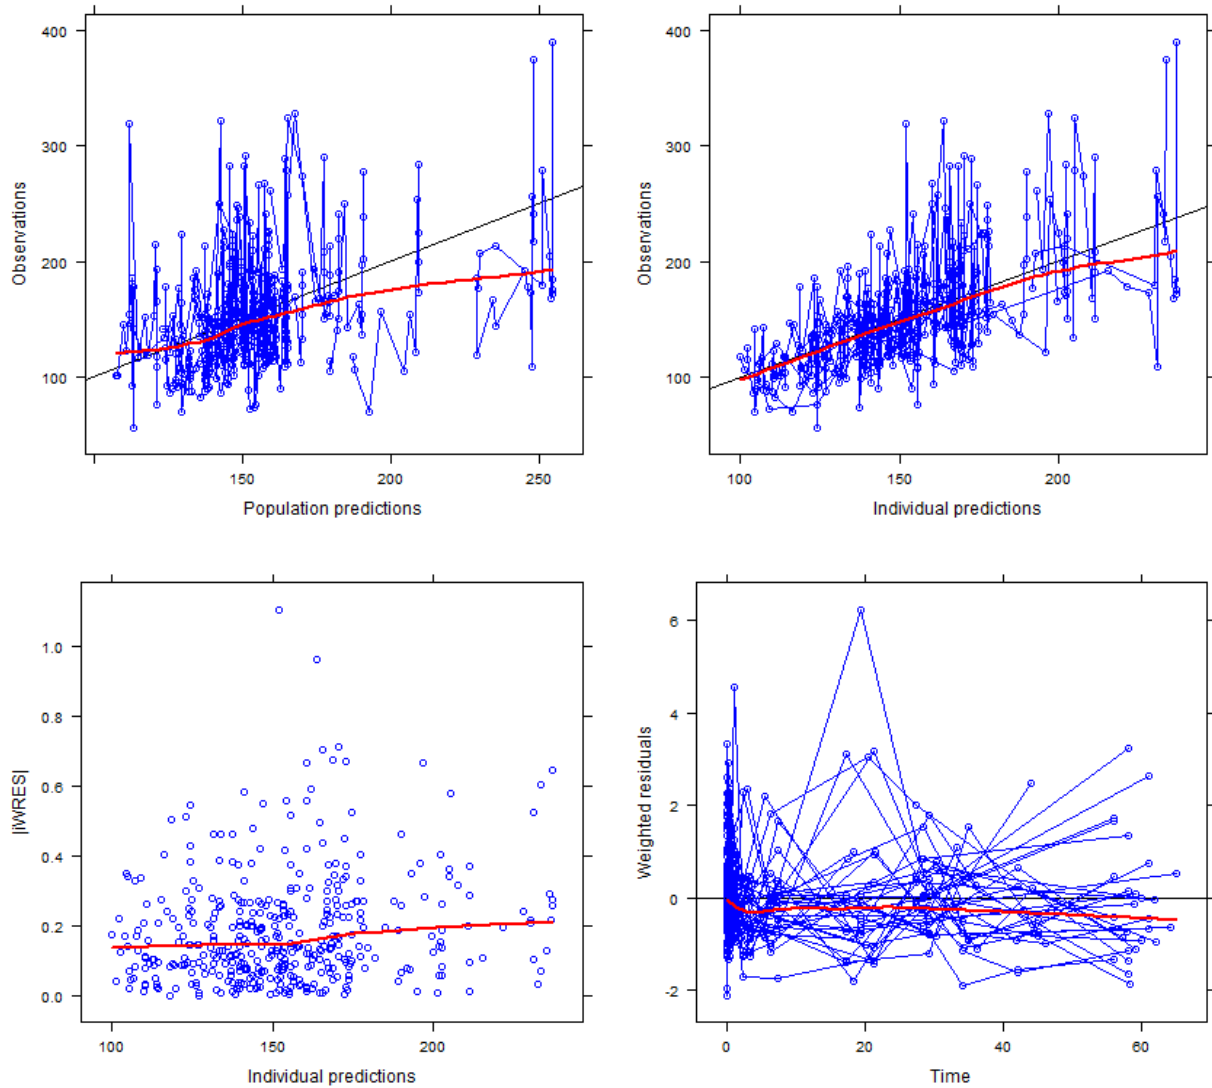

**Figure F. Basic goodness of fit plots of intracellular dATP model.** Red line represents average values. Black line represents theoretical values. Data from the same individual are showed in blue circles and are connected by lines. |IWRES|: absolute values of individual weighted residuals.



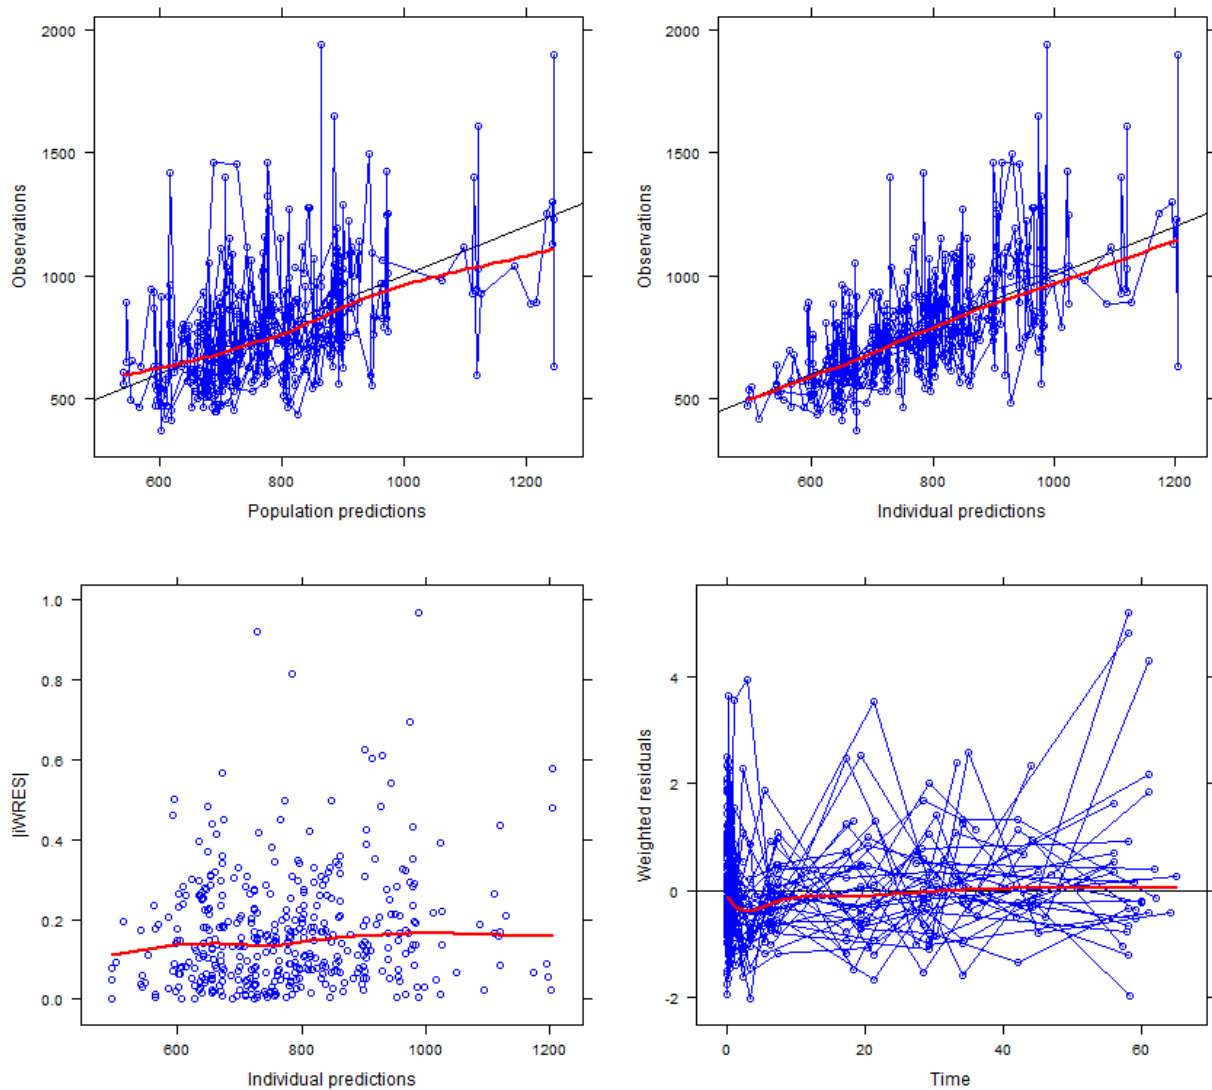

**Figure G. Basic goodness of fit plots of intracellular dCTP model.** Red line represents average values. Black line represents theoretical values. Data from the same individual are showed in blue circles and are connected by lines. |IWRES|: absolute values of individual weighted residuals.

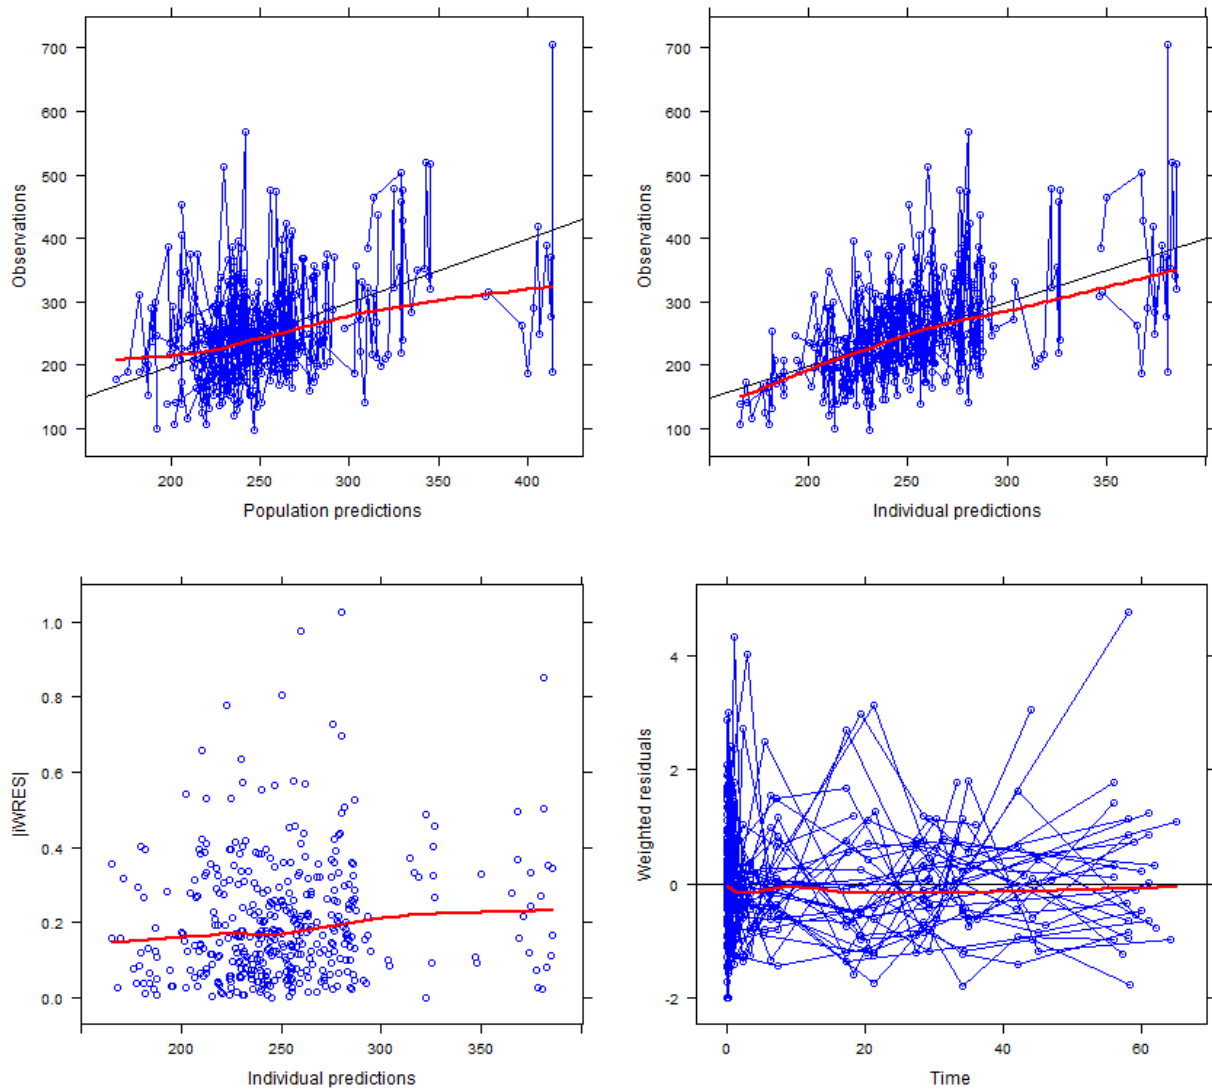

**Figure H. Basic goodness of fit plots of intracellular dGTP model.** Red line represents average values. Black line represents theoretical values. Data from the same individual are showed in blue circles and are connected by lines.  $|iWRES|$ : absolute values of individual weighted residuals.

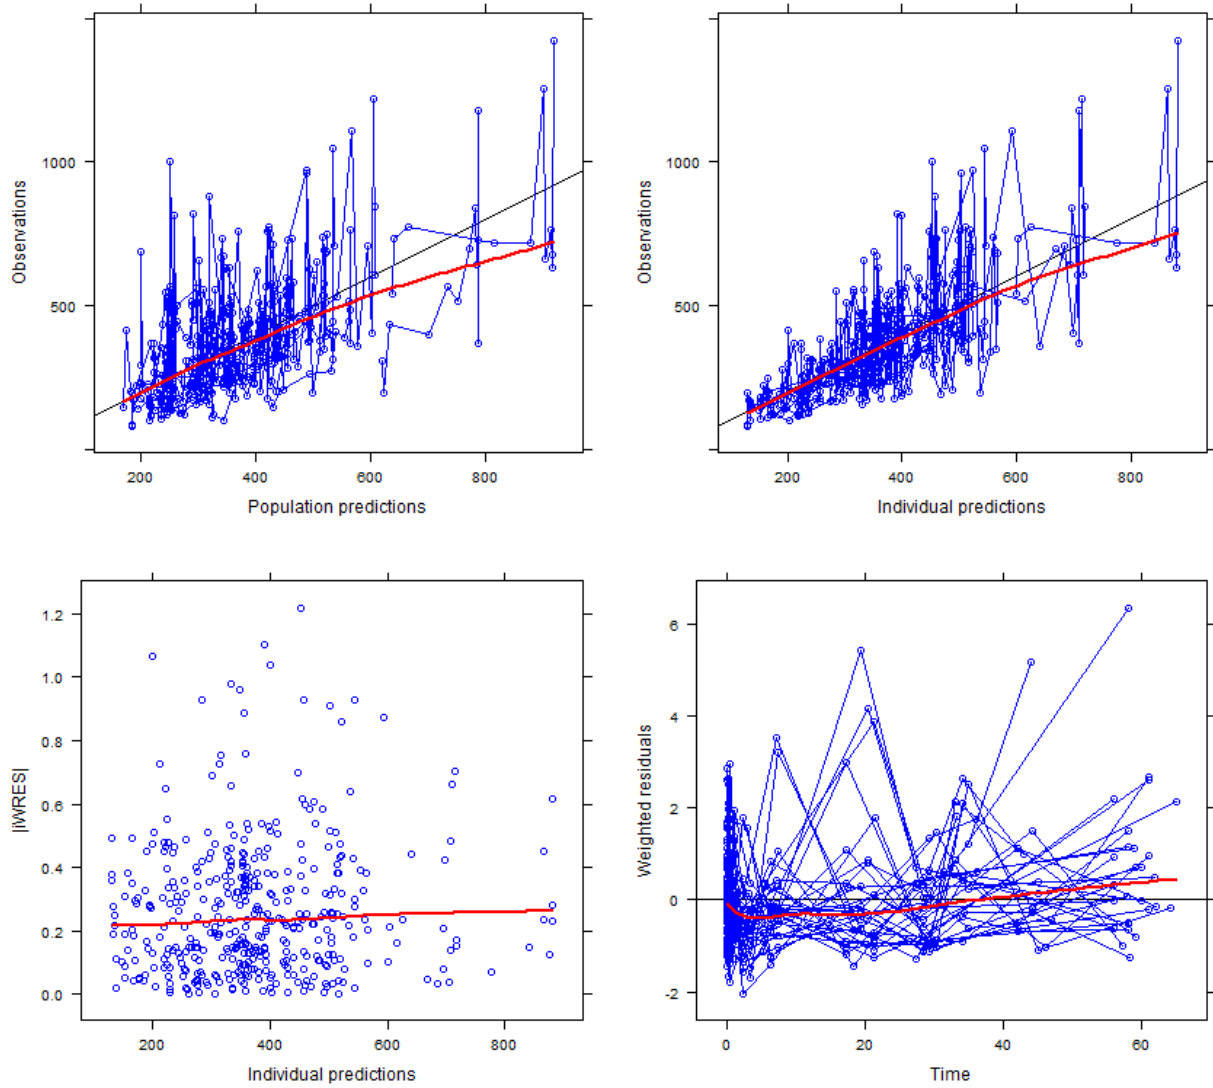

**Figure I. Basic goodness of fit plots of intracellular TTP model.** Red line represents average values. Black line represents theoretical values. Data from the same individual are showed in blue circles and are connected by lines. |iWRES|: absolute values of individual weighted residuals.

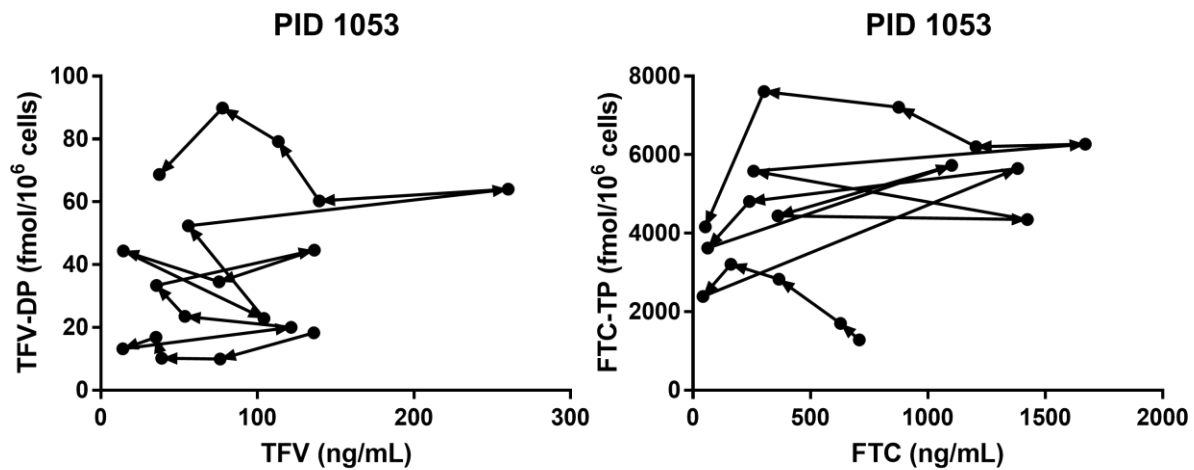

Figure J. An example of the plasma TFV/FTC vs the intracellular TFV-DP/FTC-TP “handshape” plot. Arrows indicate the progression of time after treatment initiation.

## NONMEM code:

The NONMEM code for the modeling of concentration-time data are selectively shown below.

### Plasma model:

```
$SUBROUTINES ADVAN4 TRANS4

$PK

TVCL=THETA (1)
CL=TVCL*EXP (ETA (1))
TVV2=THETA (2)
V2=TVV2*EXP (ETA (2))
TVQ=THETA (3)
Q=TVQ*EXP (ETA (3))
TVV3=THETA (4)
V3=TVV3*EXP (ETA (4))
TVKA=THETA (5)
KA=TVKA;
S2=V2
```

### Intracellular PK link model:

```
$SUBROUTINES ADVAN13 TRANS1 TOL=6

$MODEL

NCOMP=6
COMP = (DEPOT, DEFDOS)
COMP = (CENTRAL)
COMP = (RESPONSE, DEFOBS)
COMP = (PHERIPH)
COMP = (SATURATION)
COMP = (RECYCLE)

$PK

CL2 = ICL
V2 = IV2
KA2 = IKA
Q = IQ
V4 = IV3
SIN = THETA (1)
SOUT = CL2/V2
KF = THETA (1) *EXP (ETA (1))
SC50 = THETA (2)
KEL = THETA (3) *EXP (ETA (2))
R = THETA (4)
S2 = V2
K20 = CL2/V2
K24 = Q/V2
K42 = Q/V4

$DES
```

```

DADT(1) = -KA2*A(1)
DADT(2) = KA2*A(1) - K20*A(2) + K42*A(4) - K24*A(2)
C2 = A(2)/V2
DADT(5) = SIN*C2-A(5)*SOUT
CS=A(5)
KR=KEL*R/100
DADT(3) = KF*C2/(1+CS/SC50)-KEL*A(3)+KR*A(6)
DADT(4) = -K42*A(4) + K24*A(2)
DADT(6) = KR*A(3) - KR*A(6)

```

### Intracellular PKPD link model:

```
$SUBROUTINES ADVAN13 TRANS1 TOL=6
```

```
$MODEL
```

```

NCOMP=7
COMP = (DEPOT, DEFDOS)
COMP = (CENTRAL)
COMP = (RESPONSE)
COMP = (PHERIPH)
COMP = (SATURATION)
COMP = (RECYCLE)
COMP = (DNTP, DEFOBS)

```

```
$PK
```

```

CL2 = ICL
V2 = IV2
KA2 = IKA
Q = IQ
V4 = IV3
SIN = ISIN
SOUT = CL2/V2
KIN = IKIN
SC50 = ISC50
KOUT = IKOUT
R = IR
S2 = V2
K20 = CL2/V2
K24 = Q/V2
K42 = Q/V4

BPOP = THETA(1)

IIV = THETA(2)
RV = THETA(3)
BIDV = BPOP*EXP(ETA(2)*IIV)
IIVW = IIV**2/(IIV**2+RV**2)
RVW = RV**2/(IIV**2+RV**2)
BRV = EXP(ETA(1)*RV*IIVW)
IBASE = (BPOP*RVW + OBASE*IIVW)*BRV
KOUT = 1
KIN = IBASE*THETA(5)
A_0(7) = KIN/KOUT

```

```

EC50    = EXP (THETA (4) ) *EXP (ETA (3) )

$DES

DADT (1) = -KA2*A (1)
DADT (2) = KA2*A (1) - K20*A (2) + K42*A (4) - K24*A (2)
C2 = A (2) /V2
DADT (5) = SIN*C2-A (5) *SOUT
CS=A (5)
KR=KEL*R/100
DADT (3) = KF*C2/ (1+CS/SC50) -KEL*A (3) +KR*A (6)
DADT (4) = -K42*A (4) + K24*A (2)
DADT (6) = KR*A (3) - KR*A (6)
DADT (7) = KIN * ( 1- A (3) / ( EC50 + A (3) ) ) - KOUT*A (7)

$ERROR

IF (TIME.EQ.0) THEN
IPRE=IBASE
ELSE
IPRE=A (7)
ENDIF

Y = IPRE*EXP (EPS (1) *RV)

$OMEGA
1 FIXED ; [P] omega (1,1)
1 FIXED ; [P] omega (2,2)
..... ; [P] omega (3,3)

$SIGMA
1 FIXED ; [P] sigma (1,1)

```
